# Supplementary material
Source: PubMed Central journal article supplement (PMC3029744)
Supplement: 1012968108_pnas.201012968SI.pdf [file 1012968108_pnas.201012968SI.pdf]

# Supporting Information

Gillis et al. 10.1073/pnas.1012968108

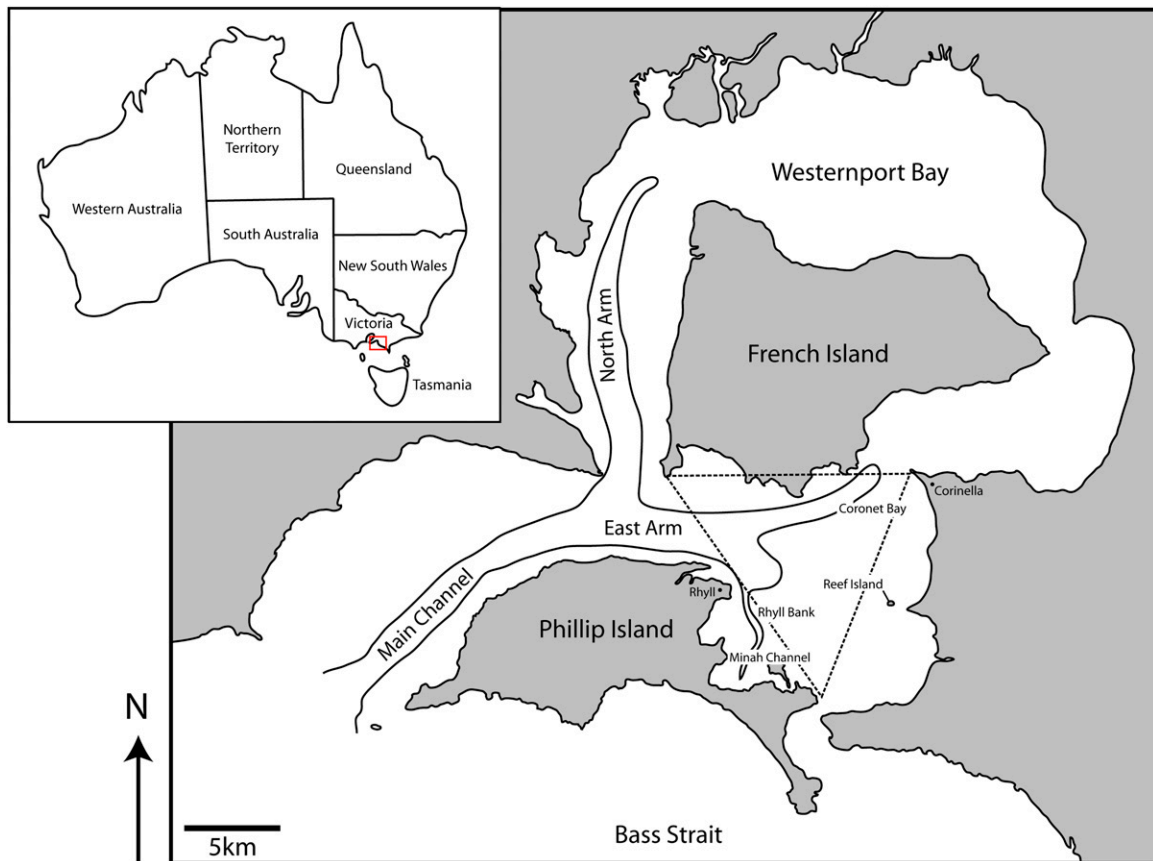

**Fig. S1.** The “elephant triangle” of Westernport Bay, Victoria, Australia. The red box in the inset map of Australia shows the location of Westernport Bay on the southern coast of Victoria. Westernport Bay contains two islands—French Island and Phillip Island. The elephant triangle (dashed line) is bound by French Island to the northwest, Phillip Island to the south, and Corinella to the northeast.

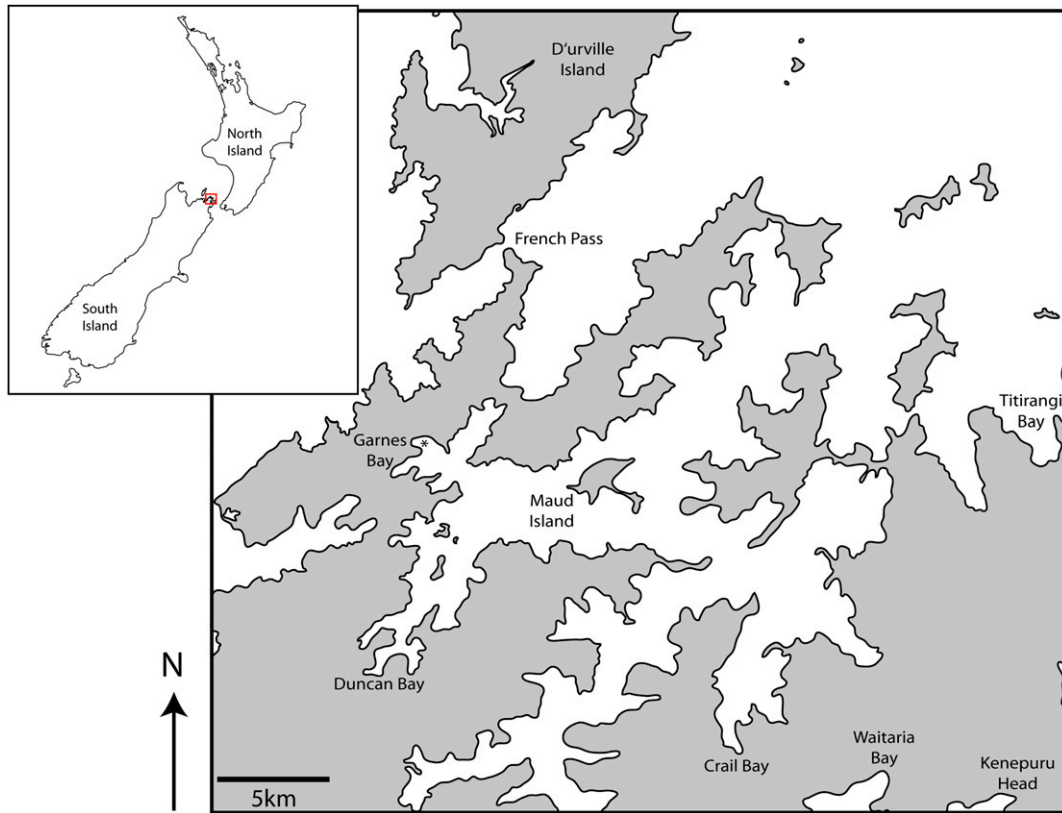

**Fig. S2.** Garnes Bay, Pelorus Sound, New Zealand. The red box in the inset map of New Zealand shows the location of Garnes Bay (asterisk) within Pelorus Sound on New Zealand's South Island.

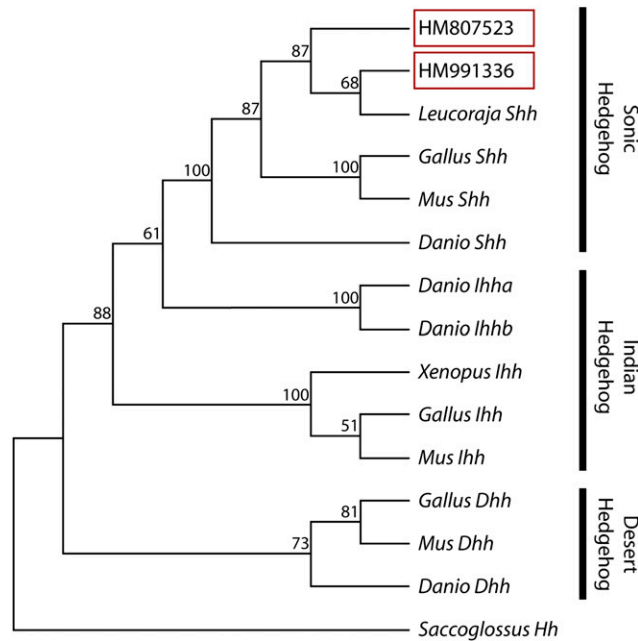

**Fig. S3.** Neighbor-joining analysis of predicted protein sequences of gnathostome Hedgehog (Hh) family members. Gnathostome Hh orthologs are abbreviated Shh (Sonic hedgehog), Ihh (Indian hedgehog), and Dhh (Desert hedgehog), and taxa included in the analysis were skate (*Leucoraja*), chicken (*Galus*), mouse (*Mus*), zebrafish (*Danio*), and frog (*Xenopus*). The single hemichordate (*Saccoglossus*) Hh ortholog was used to root the analysis. GenBank accession nos. HM991336 (*Scyliorhinus canicula Shh*) and HM807523 (*Callorhynchus milii Shh*) cluster with actinopterygian and tetrapod Shh orthologs. Figures adjacent to nodes are percentage support values from bootstrap resampling of the data (1,000 replicates).
